# Supplementary material for: Defining a Precipitation Stable Isotope Framework in the Wider Carpathian Region
Source: MDPI journal article supplement (doi:10.3390/w14162547), 2022-08-18
Supplement: s1 [file s1]

## Supplementary data

# Defining a precipitation stable isotope framework in the wider Carpathian Region

Viorica Nagavciuc <sup>1,2\*</sup>, Aurel Perşoiu <sup>3,4,\*</sup>, Carmen-Andreea Bădăluță <sup>4,5</sup>, Oleg Bogdevich<sup>6</sup>, Sorin Bănică<sup>7</sup>, Marius-Victor Bîrsan <sup>8</sup>, Sandu Boengiu <sup>9</sup>, Alexandru Onaca <sup>10</sup>, , Monica Ionita <sup>1,2,3</sup>

<sup>1</sup> Alfred Wegener Institute Helmholtz Center for Polar and Marine Research, Paleoclimate Dynamics Group, Bremerhaven, Germany

<sup>2</sup> Faculty of Forestry, Ștefan cel Mare University, Suceava, Romania

<sup>3</sup> Emil Racoviță Institute of Speleology, Romanian Academy, Cluj-Napoca, Romania

<sup>4</sup> Stable Isotope Laboratory, Ștefan cel Mare University, Suceava, 720220, Romania

<sup>5</sup> Department of Geography, Ștefan cel Mare University, Suceava, 720229, Romania

<sup>6</sup> Institute of Chemistry, Chișinău, Republic of Moldova

<sup>7</sup> Green Map Proiect, București, [032461](#), Romania

<sup>8</sup> Department of Research and Meteo Infrastructure Projects, Meteo Romania (National Meteorological Administration), 013686 Bucharest, Romania)

<sup>9</sup> Department of Geography, University of Craiova, Craiova, 200585, Romania

<sup>10</sup> Department of Geography, West University of Timișoara, Timișoara, 300223, Romania

\* Correspondence: NV: [viorica.nagavciuc@awi.de](mailto:viorica.nagavciuc@awi.de); AP: [aurel.persoiu@gmail.com](mailto:aurel.persoiu@gmail.com);

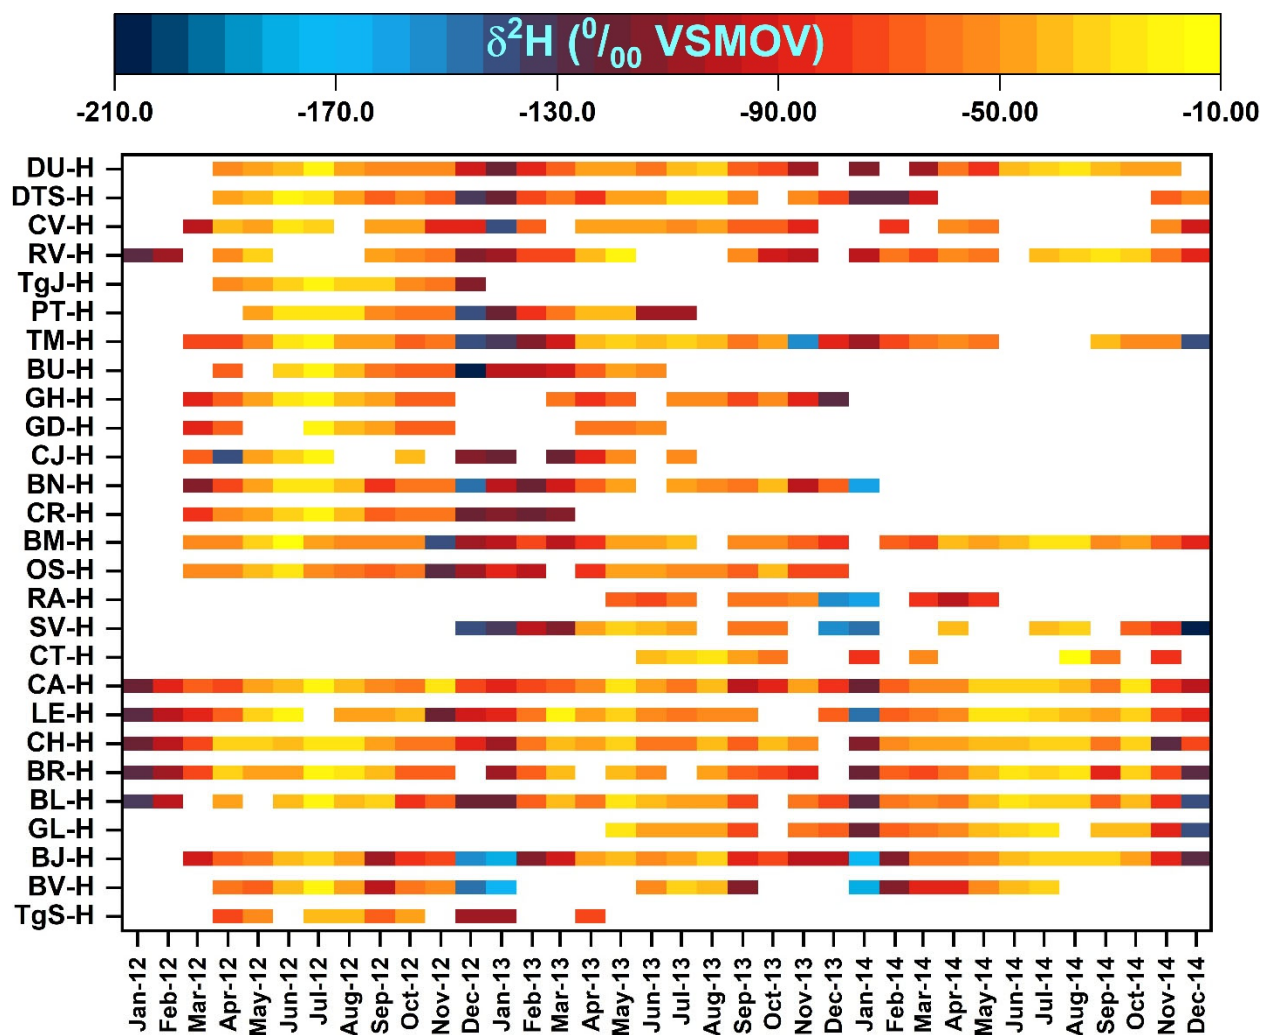

**FigureS1.** The temporal variation of stable  $\delta^2\text{H}$  at the analyzed stations for the January 2012 – December 2014 period

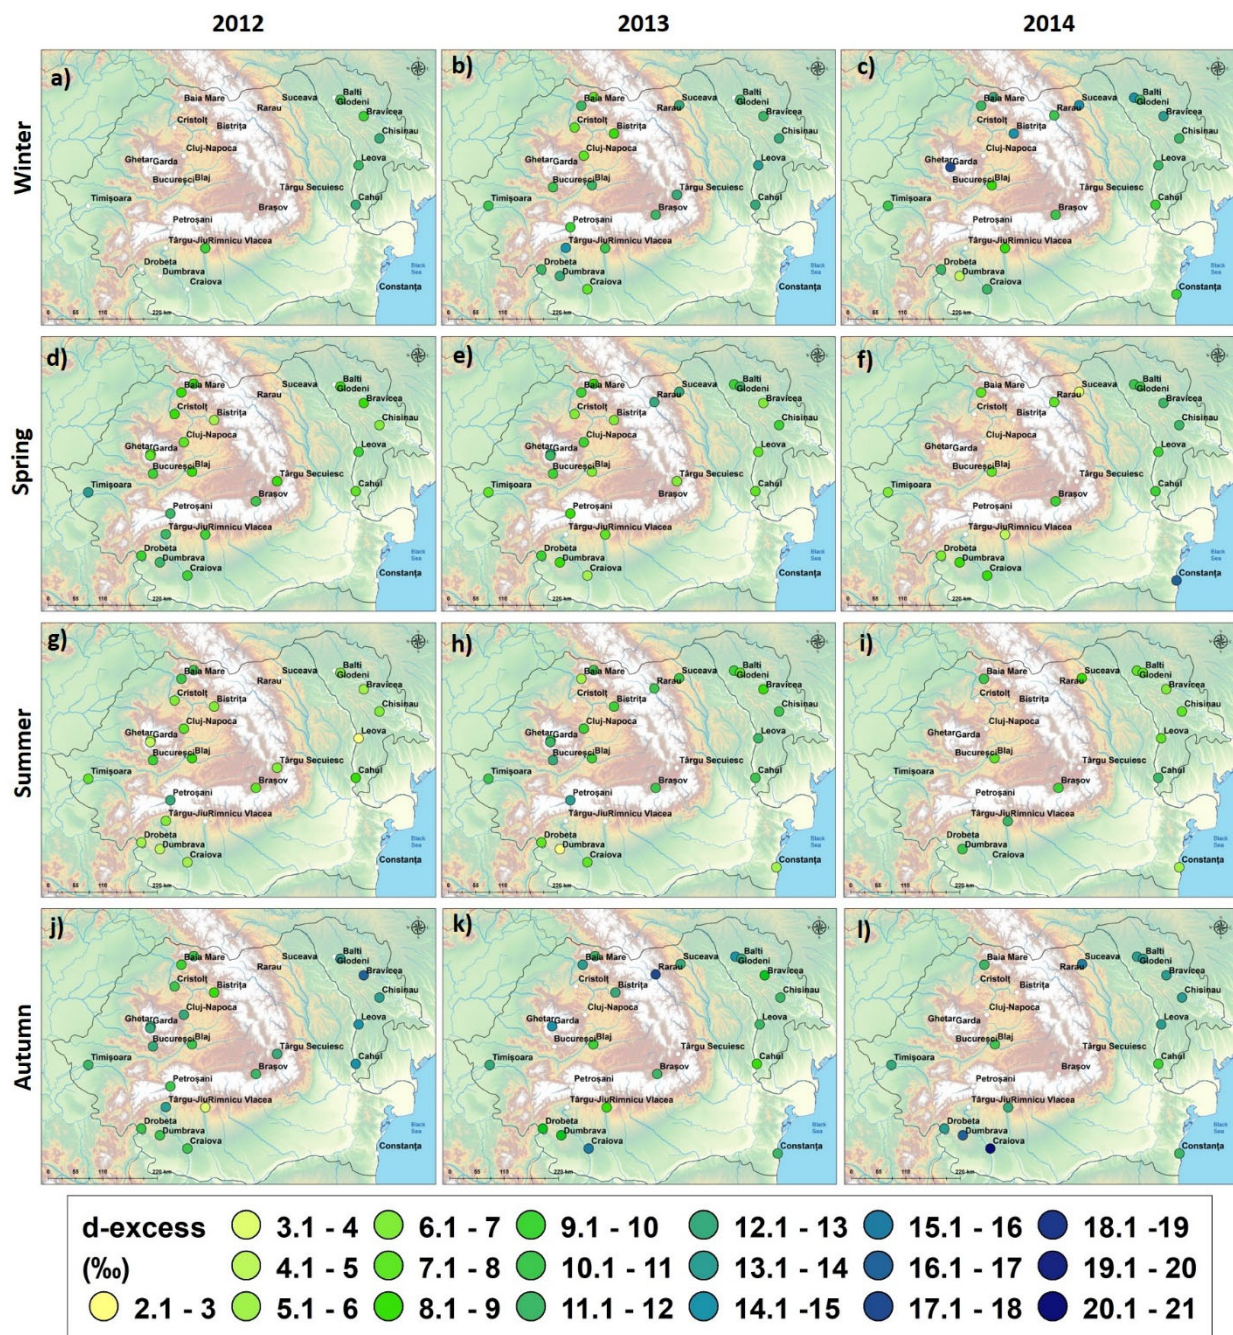

**Figure S2.** Seasonal spatial distribution of the mean d-excess values in Romania and the Republic of Moldova, for the January 2012 – December 2014 period



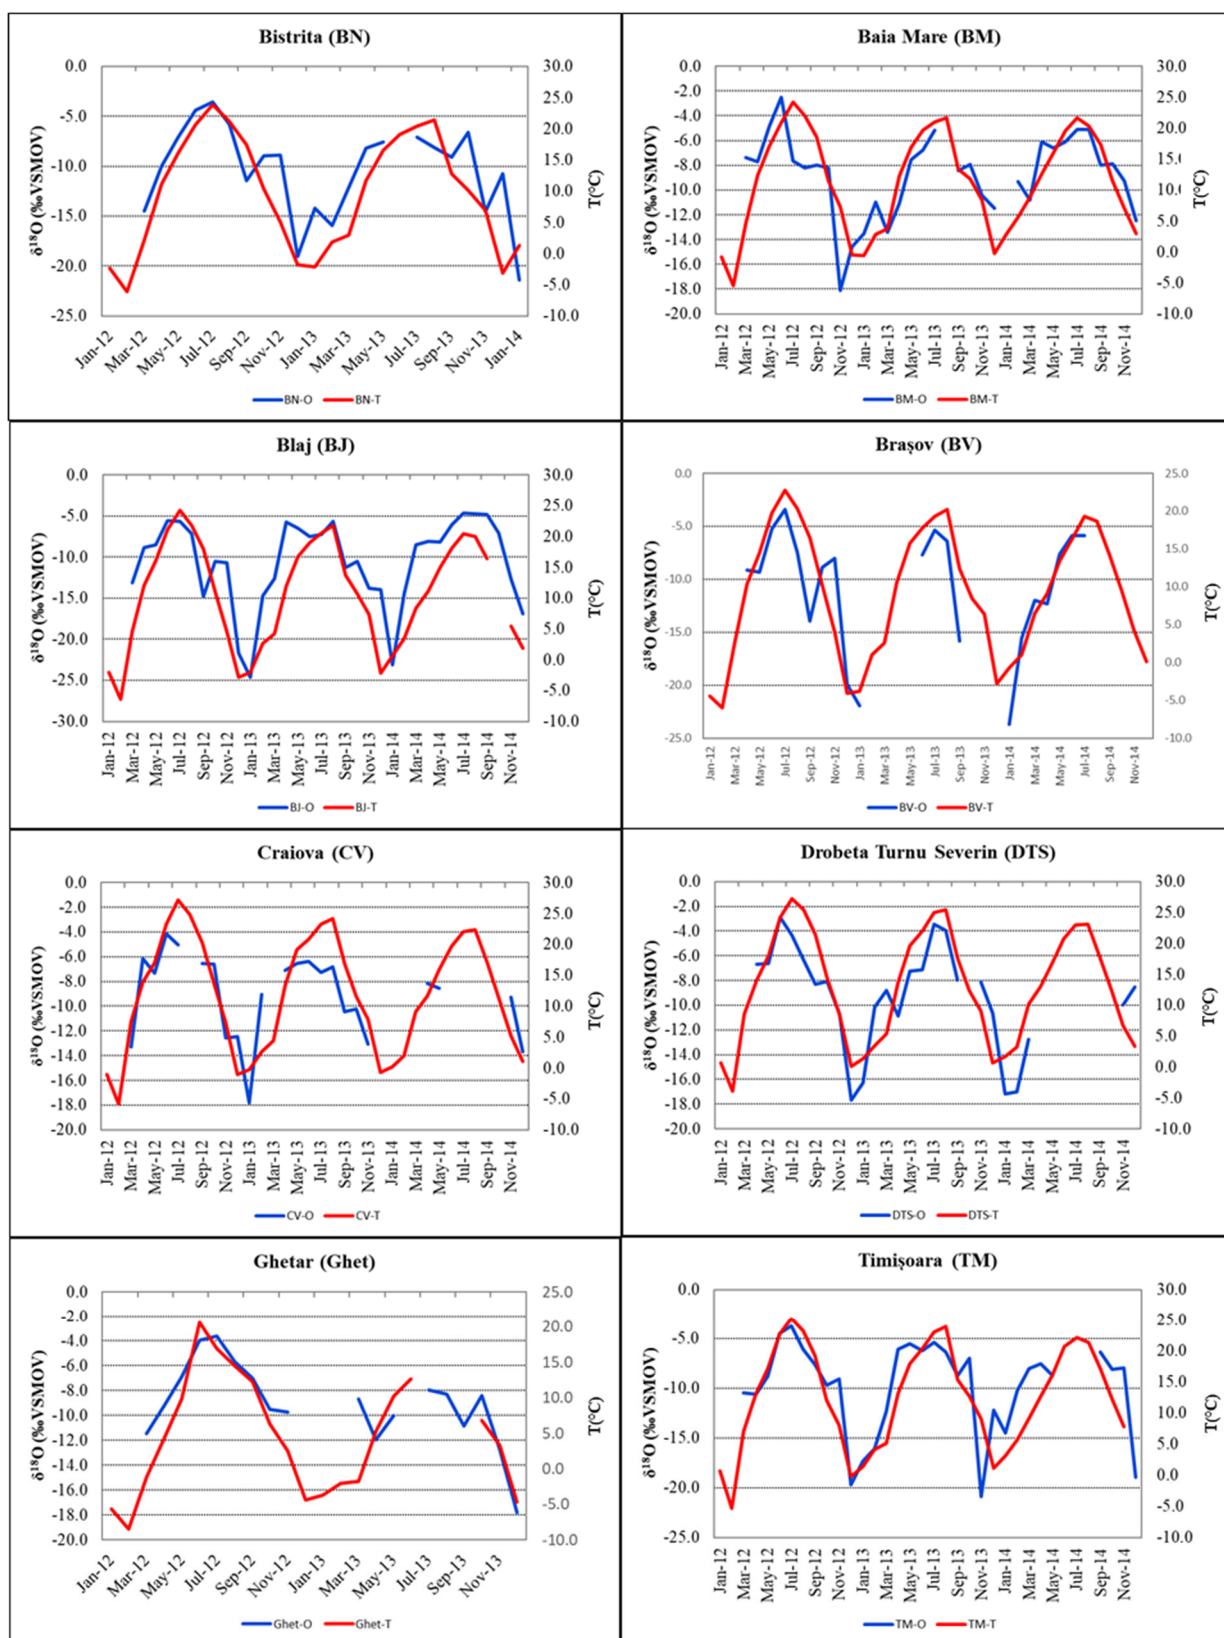

**Figure S3.** Measured monthly  $\delta^{18}\text{O}$  values in precipitation (blue line) and mean temperature (red line) for analysed period at Bistita, Baia Mare, Blaj, Brasov, Craiova, Drobeta Turnu Severin, Ghetar and Timisoara stations

**Table S1.** Local Meteoric Water Lines (LMWL) using ordinary least squares regression (OLSR) method, and precipitation amount weighted least squares regression (PWLSR) method, and the data sources, ds - differences in the slopes, di - differences in the intercepts

|        | Station name   | OLSR                                                                          | PWLSR                                                                         | ds    | di    | Study / Reference          |
|--------|----------------|-------------------------------------------------------------------------------|-------------------------------------------------------------------------------|-------|-------|----------------------------|
| West   | Baia Mare      | $\delta^2\text{H} = \delta^{18}\text{O} * (7.83 \pm 0.17) + (8.70 \pm 0.51)$  | $\delta^2\text{H} = \delta^{18}\text{O} * (7.88 \pm 0.15) + (9.35 \pm 1.44)$  | 0.05  | 0.65  | This study                 |
|        | Bistrița       | $\delta^2\text{H} = \delta^{18}\text{O} * (7.87 \pm 0.19) + (7.46 \pm 0.54)$  | $\delta^2\text{H} = \delta^{18}\text{O} * (7.90 \pm 0.20) + (7.83 \pm 2.31)$  | 0.03  | 0.37  | This study                 |
|        | Timișoara      | $\delta^2\text{H} = \delta^{18}\text{O} * (7.82 \pm 0.12) + (8.49 \pm 0.43)$  | $\delta^2\text{H} = \delta^{18}\text{O} * (7.90 \pm 0.11) + (9.39 \pm 1.21)$  | 0.08  | 0.9   | This study                 |
|        | Cristolț       | $\delta^2\text{H} = \delta^{18}\text{O} * (7.96 \pm 0.20) + (7.66 \pm 0.72)$  |                                                                               |       |       | This study                 |
|        | Gârda          | $\delta^2\text{H} = \delta^{18}\text{O} * (7.90 \pm 0.48) + (9.31 \pm 1.4)$   |                                                                               |       |       | This study                 |
|        | Ghețar         | $\delta^2\text{H} = \delta^{18}\text{O} * (7.70 \pm 0.13) + (9.18 \pm 0.42)$  |                                                                               |       |       | Badaluta et al., 2020 [1]  |
|        | Petroșani      | $\delta^2\text{H} = \delta^{18}\text{O} * (7.89 \pm 0.19) + (9.72 \pm 0.63)$  | $\delta^2\text{H} = \delta^{18}\text{O} * (7.88 \pm 0.20) + (9.65 \pm 2.13)$  | -0.01 | -0.07 | This study                 |
|        | Cluj-Napoca    | $\delta^2\text{H} = \delta^{18}\text{O} * (7.99 \pm 0.19) + (9.16 \pm 0.70)$  | $\delta^2\text{H} = \delta^{18}\text{O} * (8.06 \pm 0.16) + (9.69 \pm 1.80)$  | 0.07  | 0.53  | This study                 |
|        | Cluj-Napoca    | $\delta^2\text{H} = \delta^{18}\text{O} * (8.13 \pm 0.20) + (10.80 \pm 0.66)$ | $\delta^2\text{H} = \delta^{18}\text{O} * (8.10 \pm 0.24) + (10.75 \pm 2.31)$ | -0.03 | -0.05 | GNIP, 2015-2016 [2]        |
|        | București      | $\delta^2\text{H} = \delta^{18}\text{O} * (7.86 \pm 0.11) + (9.25 \pm 0.57)$  |                                                                               |       |       | This study                 |
|        | Hateg          | $\delta^2\text{H} = \delta^{18}\text{O} * (8.04 \pm 0.22) + (10.21 \pm 0.51)$ |                                                                               |       |       | Bojar et al., 2009 [3]     |
|        | Rosia Montana  | $\delta^2\text{H} = \delta^{18}\text{O} * (7.85 \pm 0.13) + (10.75 \pm 0.71)$ | $\delta^2\text{H} = \delta^{18}\text{O} * (7.78 \pm 0.14) + (10.18 \pm 1.48)$ | -0.07 | -0.57 | GNIP, 2015-2016 [2]        |
| Centre | Blaj           | $\delta^2\text{H} = \delta^{18}\text{O} * (7.70 \pm 0.10) + (5.73 \pm 0.39)$  | $\delta^2\text{H} = \delta^{18}\text{O} * (7.68 \pm 0.15) + (6.24 \pm 1.26)$  | -0.02 | 0.51  | This study                 |
|        | Brașov         | $\delta^2\text{H} = \delta^{18}\text{O} * (7.82 \pm 0.09) + (8.07 \pm 0.47)$  | $\delta^2\text{H} = \delta^{18}\text{O} * (7.80 \pm 0.09) + (8.34 \pm 0.96)$  | -0.08 | 0.27  | This study                 |
|        | Târgu Secuiesc | $\delta^2\text{H} = \delta^{18}\text{O} * (7.32 \pm 0.28) + (3.10 \pm 1.03)$  | $\delta^2\text{H} = \delta^{18}\text{O} * (7.43 \pm 0.27) + (4.46 \pm 2.69)$  | 0.12  | 1.36  | This study                 |
| East   | Glodeni        | $\delta^2\text{H} = \delta^{18}\text{O} * (7.75 \pm 0.19) + (9.38 \pm 0.62)$  |                                                                               |       |       | This study                 |
|        | Constanța      | $\delta^2\text{H} = \delta^{18}\text{O} * (7.05 \pm 0.37) + (2.27 \pm 0.89)$  | $\delta^2\text{H} = \delta^{18}\text{O} * (7.03 \pm 0.35) + (2.55 \pm 2.77)$  | -0.02 | 0.28  | This study                 |
|        | Leova          | $\delta^2\text{H} = \delta^{18}\text{O} * (7.73 \pm 0.11) + (7.76 \pm 0.31)$  | $\delta^2\text{H} = \delta^{18}\text{O} * (7.59 \pm 0.11) + (6.77 \pm 1.04)$  | -0.14 | -0.99 | GNIP [2]                   |
|        | Chișinău       | $\delta^2\text{H} = \delta^{18}\text{O} * (7.64 \pm 0.11) + (7.25 \pm 0.29)$  | $\delta^2\text{H} = \delta^{18}\text{O} * (7.63 \pm 0.10) + (7.14 \pm 0.93)$  | -0.01 | -0.11 | GNIP [2]                   |
|        | Cahul          | $\delta^2\text{H} = \delta^{18}\text{O} * (7.68 \pm 0.11) + (6.63 \pm 0.31)$  | $\delta^2\text{H} = \delta^{18}\text{O} * (7.70 \pm 0.10) + (6.98 \pm 0.96)$  | 0.02  | 0.35  | GNIP [2]                   |
|        | Bravicea       | $\delta^2\text{H} = \delta^{18}\text{O} * (7.79 \pm 0.12) + (7.83 \pm 0.32)$  | $\delta^2\text{H} = \delta^{18}\text{O} * (7.76 \pm 0.12) + (8.03 \pm 1.12)$  | -0.03 | 0.2   | GNIP [2]                   |
|        | Balti          | $\delta^2\text{H} = \delta^{18}\text{O} * (7.75 \pm 0.09) + (7.43 \pm 0.29)$  | $\delta^2\text{H} = \delta^{18}\text{O} * (7.64 \pm 0.08) + (6.89 \pm 0.80)$  | -0.09 | -0.54 | GNIP [2]                   |
| SW     | Craiova        | $\delta^2\text{H} = \delta^{18}\text{O} * (7.53 \pm 0.25) + (5.58 \pm 0.61)$  | $\delta^2\text{H} = \delta^{18}\text{O} * (7.33 \pm 0.24) + (4.01 \pm 2.32)$  | -0.2  | -1.57 | This study                 |
|        | DTS            | $\delta^2\text{H} = \delta^{18}\text{O} * (7.58 \pm 0.16) + (5.59 \pm 0.49)$  | $\delta^2\text{H} = \delta^{18}\text{O} * (7.82 \pm 0.14) + (8.77 \pm 1.36)$  | 0.24  | 3.18  | This study                 |
|        | Târgu-Jiu      | $\delta^2\text{H} = \delta^{18}\text{O} * (7.06 \pm 0.31) + (3.75 \pm 0.78)$  | $\delta^2\text{H} = \delta^{18}\text{O} * (7.08 \pm 0.34) + (4.30 \pm 2.95)$  | 0.02  | 0.55  | This study                 |
|        | Dumbrava       | $\delta^2\text{H} = \delta^{18}\text{O} * (7.41 \pm 0.20) + (4.41 \pm 0.44)$  | $\delta^2\text{H} = \delta^{18}\text{O} * (7.70 \pm 0.18) + (7.81 \pm 1.77)$  | 0.29  | 3.4   | Bojar et al., 2017 [4]     |
| N      | Suceava        | $\delta^2\text{H} = \delta^{18}\text{O} * (7.74 \pm 0.11) + (8.99 \pm 0.50)$  | $\delta^2\text{H} = \delta^{18}\text{O} * (7.75 \pm 0.13) + (9.09 \pm 1.41)$  | 0.01  | 0.1   | Nagavciuc et al (2019) [5] |
|        | Ocna Șugatag   | $\delta^2\text{H} = \delta^{18}\text{O} * (7.98 \pm 0.15) + (9.77 \pm 0.71)$  | $\delta^2\text{H} = \delta^{18}\text{O} * (7.96 \pm 0.14) + (9.41 \pm 1.25)$  | -0.02 | -0.26 | This study                 |
|        | Rarau          | $\delta^2\text{H} = \delta^{18}\text{O} * (8.14 \pm 0.24) + (13.72 \pm 0.67)$ | $\delta^2\text{H} = \delta^{18}\text{O} * (8.00 \pm 0.25) + (12.19 \pm 2.90)$ | -0.14 | -1.53 | Nagavciuc et al (2019) [5] |

## References

1. Bădăluță, C.-A.; Perșoiu, A.; Ionita, M.; Piotrowska, N. Stable isotopes in cave ice suggest summer temperatures in east-central Europe are linked to Atlantic Multidecadal Oscillation variability. *Clim. Past* **2020**, *16*, 2445–2458, doi:doi.org/10.5194/cp-16-2445-2020.
2. IAEA/WMO Global Network of Isotopes in Precipitation. The GNIP Database Available online: <https://nucleus.iaea.org/wiser/index.aspx> (accessed on Jan 5, 2020).
3. Bojar, A.V.; Ottner, F.; Bojar, H.P.; Grigorescu, D.; Perșoiu, A. Stable isotope and mineralogical investigations on clays from the Late Cretaceous sequences, Hațeg Basin, Romania. *Appl. Clay Sci.* **2009**, *45*, 155–163, doi:10.1016/j.clay.2009.04.005.
4. Bojar, A.V.; Halas, S.; Bojar, H.P.; Chmiel, S. Stable isotope hydrology of precipitation and groundwater of a region with high continentality, South Carpathians, Romania. *Carpathian J. Earth Environ. Sci.* **2017**, *12*, 513–524, doi:10.1007/s00165-016-0405-z.
5. Nagavciuc, V.; Bădăluță, C.-A.; Ionita, M.; Bădăluță, C.-A.; Ionita, M. Tracing the Relationship between Precipitation and River Water in the Northern Carpathians Base on the Evaluation of Water Isotope Data. *Geosciences* **2019**, *9*, 1–14, doi:doi:10.3390/geosciences9050198.
